# Supplementary material for: Polymorphism dependent charge transport property of 9,10-bis((E)-2-(pyrid-2-yl)vinyl)anthracene: a theoretical study
Source: Royal Society of Chemistry journal article supplement (doi:10.1039/c4ra14274h), 2015-01-01
Supplement: c4ra14274h1.pdf [file c4ra14274h1.pdf]

## 5 Polymorphism Dependent Charge Transport Property of 9, 10-Bis ((E)- 2-(pyrid-2-yl) vinyl) anthracene: A Theoretical Study

**Qing Guo,<sup>a</sup> Lijuan Wang,<sup>a</sup> Fuquan Bai,<sup>b</sup> Yuanfei Jiang,<sup>c</sup> Jing Guo,<sup>c</sup> Bin Xu,<sup>\*a</sup> and Wenjing Tian<sup>\*\*a</sup>**

10 <sup>a</sup> State Key Laboratory of Supra-molecular Structure and Materials, Jilin University, Changchun 130012, P. R. China.. Fax: 86-431-85155359; Tel: 86-431-85166368; E-mail: wjtian@jlu.edu.cn

<sup>b</sup> State Key Laboratory of Theoretical and Computational Chemistry, Institute of Theoretical Chemistry, Jilin University, Changchun 130023, P. R. China. Fax: 86-431-88498966; Tel: 86-431-85168706; E-mail: baifq@jlu.edu.cn

<sup>c</sup> Institution of Atomic and Molecular Physics, Jilin University, Changchun 130012, P. R. China. Fax: 86-431-85168772; Tel: 86-431-85168706; E-mail: gjing@jlu.edu.cn

Table S1. Selected Bond Lengths (Ang) Angles (Deg) and Torsion (Deg) of different crystal structure in the Neutral and Ionic States, together with Experimental Values for  $\alpha$ -,  $\beta$ - and  $\gamma$ -BP2VA, separately.

| Parameters( $\alpha$ )                               | Neutral(N) | Cationic(C) | Anionic(A) | Crystal     | $\Delta$ (C-N) | $\Delta$ (A-N) |
|------------------------------------------------------|------------|-------------|------------|-------------|----------------|----------------|
| R(N1-C2)/R(N1'-C2')                                  | 1.33       | 1.33        | 1.33       | 1.33        | 0              | 0              |
| R(C6-N1)/R(C6'-N1')                                  | 1.35       | 1.35        | 1.36       | 1.34        | 0              | 0.01           |
| R(C7-C8)/R(C7'-C8')                                  | 1.35       | 1.36        | 1.38       | 1.32        | 0.01           | 0.03           |
| R(C8-C9)/R(C8'-C9')                                  | 1.47       | 1.45        | 1.44       | 1.48        | -0.02          | -0.03          |
| $\theta$ (N1-C2-C3)/ $\theta$ (N1'-C2'-C3')          | 124.0      | 123.6       | 124.9      | 124.3       | -0.4           | 0.9            |
| $\theta$ (C5-C6-N1)/ $\theta$ (C5'-C6'-N1')          | 121.7      | 122.5       | 120.2      | 121.8       | 0.8            | -1.5           |
| $\theta$ (N1-C6-C7-C8)/ $\theta$ (N1'-C6'-C7'-C8')   | 1.6        | 2.7         | 5.8        | 8.2         | 1.1            | 4.2            |
| $\theta$ (C7-C8-C9-C10)/ $\theta$ (C7'-C8'-C9'-C10') | 52.4       | 41.6        | 30.5       | 59.5        | -10.8          | -21.9          |
| Parameters( $\beta$ )                                | Neutral(N) | Cationic(C) | Anionic(A) | Crystal     | $\Delta$ (C-N) | $\Delta$ (A-N) |
| R(N1-C2)/R(N1'-C2')                                  | 1.34       | 1.33        | 1.33       | 1.32        | -0.01          | -0.01          |
| R(C6-N1)/R(C6'-N1')                                  | 1.35       | 1.35        | 1.37       | 1.32        | 0              | 0.02           |
| R(C7-C8)/R(C7'-C8')                                  | 1.35       | 1.36        | 1.37       | 1.27        | 0.01           | 0.02           |
| R(C8-C9)/R(C8'-C9')                                  | 1.48       | 1.45        | 1.44       | 1.49        | -0.03          | -0.04          |
| $\theta$ (N1-C2-C3)/ $\theta$ (N1'-C2'-C3')          | 123.9      | 123.5       | 124.8      | 124.9       | -0.4           | 0.9            |
| $\theta$ (C5-C6-N1)/ $\theta$ (C5'-C6'-N1')          | 121.6      | 122.3       | 120.2      | 122.0       | 0.7            | -1.4           |
| $\theta$ (N1-C6-C7-C8)/ $\theta$ (N1'-C6'-C7'-C8')   | 172.2      | 173.2       | 169.1      | 176.7       | 1              | -3.1           |
| $\theta$ (C7-C8-C9-C10)/ $\theta$ (C7'-C8'-C9'-C10') | 128.3      | 136.7       | 148.3      | 116.8       | 8.4            | 20             |
| Parameters( $\gamma$ )                               | Neutral(N) | Cationic(C) | Anionic(A) | Crystal     | $\Delta$ (C-N) | $\Delta$ (A-N) |
| R(N1-C2)/R(N1'-C2')                                  | 1.33       | 1.33        | 1.33       | 1.34/1.32   | 0              | 0              |
| R(C6-N1)/R(C6'-N1')                                  | 1.35       | 1.35        | 1.36       | 1.35/1.34   | 0              | 0.01           |
| R(C7-C8)/R(C7'-C8')                                  | 1.35       | 1.36        | 1.38       | 1.30/1.33   | 0.01           | 0.03           |
| R(C8-C9)/R(C8'-C9')                                  | 1.47       | 1.45        | 1.44       | 1.50/1.47   | -0.02          | -0.03          |
| $\theta$ (N1-C2-C3)/ $\theta$ (N1'-C2'-C3')          | 124.0      | 123.6       | 124.9      | 123.7/124.4 | -0.4           | 0.9            |
| $\theta$ (C5-C6-N1)/ $\theta$ (C5'-C6'-N1')          | 121.7      | 122.5       | 120.2      | 121.6/121.7 | 0.8            | -1.5           |
| $\theta$ (N1-C6-C7-C8)/ $\theta$ (N1'-C6'-C7'-C8')   | 1.6        | 2.7         | 5.9        | 14.1/6.7    | 1.1            | 4.3            |
| $\theta$ (C7-C8-C9-C10)/ $\theta$ (C7'-C8'-C9'-C10') | 52.4       | 41.8        | 30.9       | 51.2/53.4   | -10.6          | -21.5          |

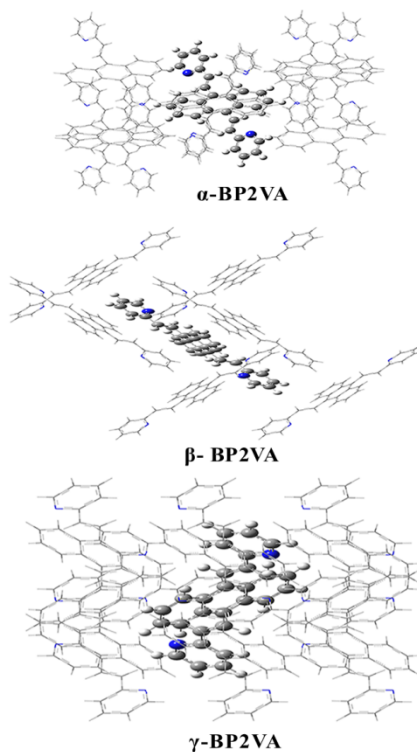

5 Figure S1. The central molecule surrounded by the nearest-neighbouring (NN) molecules used to calculate the reorganization energy. The ball and stick model represents the region treated with QM method, and the wire model represents the region treated with MM method.
